# Supplementary material for: Association between circulating antioxidants and sleep disorders: comprehensive results from NHANES 2017–2018
Source: Royal Society of Chemistry journal article supplement (doi:10.1039/d4fo00413b), 2024-01-01
Supplement: d4fo00413b1.pdf [file d4fo00413b1.pdf]

Table.S1 The lower limit of detection of circulating antioxidants in NHANES 2017–2018 dataset

| <b>Variable codes</b> | <b>Antioxidants</b>           | <b>Lower limit of detection</b> |
|-----------------------|-------------------------------|---------------------------------|
| LBXALC                | alpha-carotene (ug/dL)        | 0.7                             |
| LBXARY                | alpha-cryptoxanthin (ug/dL)   | 0.2                             |
| LBXBEC                | trans-beta-carotene (ug/dL)   | 0.8                             |
| LBXBSE                | Blood selenium (ug/L)         | 24.48                           |
| LBXCBC                | cis-beta-carotene (ug/dL)     | 0.7                             |
| LBXCRY                | beta-cryptoxanthin (ug/dL)    | 0.9                             |
| LBXGTC                | gamma-tocopherol (ug/dL)      | 11                              |
| LBXLCC                | Total Lycopene (ug/dL)        | 1                               |
| LBXLUZ                | Lutein and zeaxanthin (ug/dL) | 2.4                             |
| LBXLYC                | trans-lycopene (ug/dL)        | 0.8                             |
| LBXRPL                | Retinyl palmitate (ug/dL)     | 1.3                             |
| LBXRST                | Retinyl stearate (ug/dL)      | 0.7                             |
| LBXVIA                | Retinol (ug/dL)               | 1                               |
| LBXVIC                | Vitamin C (mg/dL)             | 0.03                            |
| LBXVIE                | alpha-tocopherol (ug/dL)      | 40                              |

Table.S2 The detection rate of circulating antioxidants in NHANES 2017–2018 dataset

| <b>Variable codes</b> | <b>Antioxidants</b>           | <b>At or above the detection limit individuals</b> | <b>Below lower detection limit individuals</b> | <b>Detection rate (%)</b> |
|-----------------------|-------------------------------|----------------------------------------------------|------------------------------------------------|---------------------------|
| LBXBSE                | Blood selenium (ug/L)         | 7513                                               | 0                                              | 100                       |
| LBXGTC                | gamma-tocopherol (ug/dL)      | 6731                                               | 0                                              | 100                       |
| LBXVIA                | Retinol (ug/dL)               | 6812                                               | 0                                              | 100                       |
| LBXVIE                | alpha-tocopherol (ug/dL)      | 6665                                               | 0                                              | 100                       |
| LBXLCC                | Total Lycopene (ug/dL)        | 6388                                               | 4                                              | 99.94                     |
| LBXLUZ                | Lutein and zeaxanthin (ug/dL) | 6492                                               | 8                                              | 99.88                     |
| LBXLYC                | trans-lycopene (ug/dL)        | 6454                                               | 9                                              | 99.86                     |
| LBXARY                | alpha-cryptoxanthin (ug/dL)   | 6471                                               | 11                                             | 99.83                     |
| LBXBEC                | trans-beta-carotene (ug/dL)   | 6568                                               | 14                                             | 99.79                     |
| LBXCRY                | beta-cryptoxanthin (ug/dL)    | 6459                                               | 29                                             | 99.55                     |
| LBXALC                | alpha-carotene (ug/dL)        | 5796                                               | 486                                            | 92.26                     |
| LBXVIC                | Vitamin C (mg/dL)             | 6740                                               | 695                                            | 90.65                     |
| LBXCBC                | cis-beta-carotene (ug/dL)     | 3063                                               | 3161                                           | 49.21                     |
| LBXRPL                | Retinyl palmitate (ug/dL)     | 2526                                               | 3755                                           | 40.22                     |
| LBXRST                | Retinyl stearate (ug/dL)      | 632                                                | 5491                                           | 10.32                     |

Table.S3 The detail information of the measurement of sleeping status and sleep disorders related symptoms

| Code or Value | Value Description                         | Binary outcome |
|---------------|-------------------------------------------|----------------|
| SLQ030        | How often do you snore?                   |                |
| 0             | Never                                     | No             |
| 1             | Rarely - 1-2 nights a week                | No             |
| 2             | Occasionally - 3-4 nights a week          | Yes            |
| 3             | Frequently - 5 or more nights a week      | Yes            |
| 7             | Refused                                   | Excluded       |
| 9             | Don't know                                | Excluded       |
| SLQ040        | How often do you snort or stop breathing? |                |
| 0             | Never                                     | No             |
| 1             | Rarely - 1-2 nights a week                | No             |
| 2             | Occasionally - 3-4 nights a week          | Yes            |
| 3             | Frequently - 5 or more nights a week      | Yes            |
| 7             | Refused                                   | Excluded       |
| 9             | Don't know                                | Excluded       |
| SLQ050        | Ever told doctor had trouble sleeping?    |                |
| 1             | Yes                                       | Yes            |
| 2             | No                                        | No             |
| 7             | Refused                                   | Excluded       |
| 9             | Don't know                                | Excluded       |
| SLD012        | Sleep hours - weekdays or workdays        |                |
|               | Range of Values                           |                |
| SLD013        | Sleep hours - weekends                    |                |
|               | Range of Values                           |                |

Table.S3 The questionnaire selection of demographic and health-related covariates

| Covariable code | Questionnaire label                          | Variable value                                                                                                                              |
|-----------------|----------------------------------------------|---------------------------------------------------------------------------------------------------------------------------------------------|
| RIAGENDR        | Gender                                       | 1 for male, 2 for female                                                                                                                    |
| RIDAGEYR        | Age in years at screening                    | 1 for 20-39, 2 for 40-59, 3 for $\geq 60$                                                                                                   |
| RIDRETH1        | Race/Hispanic origin                         | 1 for Mexican American, 2 for Other Hispanic, 3 for Non-Hispanic White, 4 for Non-Hispanic Black, 5 for Other Race - Including Multi-Racial |
| DMDEDUC2        | Education level - Adults 20+                 | 1 for below high school, 2 for high school, 3 for above high school                                                                         |
| DMDMARTL        | Marital status                               | 1 for Married, 2 for Widowed, 3 for Divorced, 4 for Separated, 5 for Never married, 6 for Living with partner                               |
| ALQ121          | Past 12 months how often have alcohol drink? | 1 for yes, 2 for no                                                                                                                         |
| BMXBMI          | Body Mass Index (kg/m**2)                    | <25, 25-30, $\geq 30$                                                                                                                       |
| BPQ020          | Ever told you had high blood pressure?       | 1 for yes, 2 for no                                                                                                                         |
| DIQ010          | Doctor told you have diabetes?               | 1 for yes, 2 for no, 3 for borderline                                                                                                       |
| KIQ022          | Ever told you had weak/failing kidneys?      | 1 for yes, 2 for no                                                                                                                         |
| SMQ040          | Do you now smoke cigarettes?                 | 1 for yes, 2 for no                                                                                                                         |
